# Supplementary material for: Glutamine metabolism modulates chondrocyte inflammatory response
Source: eLife. 2022 Aug 2;11:e80725. doi: 10.7554/eLife.80725 (PMC9371604; doi:10.7554/eLife.80725)
Supplement: Figure 1—figure supplement 1—source data 1. [file elife-80725-fig1-figsupp1-data1.xlsx]

## Sheet: Fig S1A
Time (minutes)	4 mM Glutamine								4 mM Glutamine + IL-1β								4 mM Glutamine + CB-839								4 mM Glutamine + CB-839 + IL-1β
2.41667	9.55449	16.7812	14.0814	5.3678	17.9335	16.8411	16.0761	13.3611	6.35822	21.9768	16.899	15.6464	10.0496	13.2593	18.5082	17.5128	8.28231	17.3269	16.9945	7.76362	6.72944	17.9737	6.35923	-3.54927	3.4584	16.1074	8.54521	5.39452	-0.404808	12.7098	10.6487	13.5163
8.51667	12.9726	14.0306	15.6364	13.7947	15.0564	14.2618	13.718	14.1247	12.5987	15.8071	16.1633	15.1233	12.4575	14.091	13.5574	14.3926	12.7823	14.4258	14.1562	13.4098	11.1323	15.1717	11.0505	10.9861	12.2193	15.2207	11.9403	13.8573	10.7851	17.5852	14.7065	16.3621
14.6	13.0975	13.8297	15.6254	14.9272	15.3064	13.7856	13.6266	14.2538	13.8043	15.0724	15.7225	15.1378	13.0028	13.6768	13.4786	14.1501	13.5758	14.2312	13.2224	14.8952	11.6296	14.857	10.8553	12.0985	12.5853	14.9986	11.1839	14.6336	11.8588	17.8154	14.3267	16.078
20.7	12.8141	13.994	15.4906	15.2734	15.2403	13.5808	13.1461	14.3961	14.0681	14.4628	15.5211	15.7733	13.0896	13.7984	13.5509	14.0713	13.7711	14.0523	12.8104	14.349	11.7872	14.5727	10.5778	12.6409	12.5754	15.0115	10.5047	14.6693	11.5888	16.7692	14.1425	15.7981
26.7833	12.819	14.8669	15.1614	15.1321	15.1966	13.3883	12.9282	14.2486	13.9923	14.4159	15.1736	15.7005	13.335	13.9431	13.3382	14.0499	13.82	13.8773	12.5883	13.937	11.8875	14.5388	10.3933	12.7347	12.577	14.7376	10.4041	14.5001	11.6611	16.9462	13.9906	15.7148
32.8667	12.4962	13.6097	14.8903	14.7646	15.0535	13.1497	12.8501	13.9218	13.8393	14.0966	14.9248	15.6527	13.1436	13.6864	13.2517	13.8183	13.7131	13.8084	12.3847	11.693	11.7746	14.1677	10.2704	12.4977	12.3791	14.5329	9.98067	14.1273	11.4862	16.3297	13.5625	15.4947
39.2	28.2542	29.7882	27.9488	25.0597	27.2027	29.7611	21.5588	21.0198	30.6321	31.9707	31.1562	32.8201	27.3683	33.3785	29.7906	26.144	27.3082	26.0876	23.8226	20.4762	19.8024	26.6044	23.148	24.26	21.8441	27.457	23.8391	24.7773	19.1476	30.5561	28.581	25.0426
45.3	25.858	25.5952	25.2713	24.4421	24.6954	25.0282	19.2769	20.9098	28.1626	27.0929	27.0028	30.8561	25.6204	28.9151	25.7173	26.719	23.9321	23.7436	21.7343	21.2835	19.8982	24.0698	21.2922	23.6671	22.0403	25.4517	21.3285	24.5418	20.0652	29.0957	24.7676	25.7452
51.3833	24.0278	23.9846	23.6954	23.9742	23.6937	22.4726	18.3209	20.2715	26.4665	25.3097	25.1793	29.5877	24.3758	25.8799	23.4918	26.8053	22.6775	22.3483	20.2134	20.6882	19.8306	22.835	19.1078	22.1656	21.5556	24.6315	19.4643	24.1604	19.4319	27.211	23.0301	25.0317
57.4667	22.2584	22.8829	23.1221	22.75	22.9376	21.1449	17.9576	19.8842	26.0074	24.3345	24.5827	28.9263	24.2562	24.2685	22.3025	26.3605	21.9019	21.7361	19.5012	19.6256	19.2067	22.4972	18.0516	21.2331	20.919	24.6063	18.448	23.6833	19.0876	27.006	22.0251	24.8836
63.5667	21.5262	21.9641	22.846	22.0333	22.3929	19.819	17.46	19.5369	24.9535	23.3514	23.9561	28.2635	23.3764	23.1945	21.3563	25.8628	21.2672	21.1385	18.5582	20.004	18.6515	21.9598	16.9894	20.5997	20.3412	24.2791	17.1438	22.9629	18.8225	25.9981	20.8168	24.4596
69.6667	21.1566	21.7062	22.861	21.8465	22.1145	19.0505	17.3114	19.5629	23.9014	22.8308	23.5321	27.3353	22.2895	22.5441	20.7452	25.3445	21.1077	20.4876	17.7186	20.141	18.0613	21.6091	16.2672	19.8887	19.7811	23.852	16.0297	22.5194	18.4697	25.3196	20.2981	24.1251
76	20.7245	22.4618	20.9999	20.2564	21.9946	20.9238	16.6492	19.4442	20.1163	22.2775	21.4628	23.7008	18.7036	21.6296	19.5997	21.9088	17.8038	18.9691	17.0485	17.3034	16.249	19.7192	16.4833	17.1891	17.6925	20.1975	14.4053	19.5576	16.6651	23.2952	16.1036	20.385
82.05	20.9746	20.7771	20.108	20.3575	21.2364	18.987	15.8279	18.6771	19.7058	18.9201	19.7082	22.4028	18.1752	19.149	17.0431	24.7305	17.4566	16.9192	15.3896	16.4464	15.9796	17.8324	14.3347	16.6155	17.7887	19.1937	13.1875	18.9489	17.0074	22.2072	16.8538	20.1973
88.1333	21.2274	21.2804	20.026	21.1029	21.5584	18.0381	15.759	18.4538	19.744	18.0006	19.1452	22.2225	18.0936	18.2313	16.6983	25.1296	17.6283	16.5115	14.9074	14.0208	15.6582	17.6697	13.7703	16.2087	17.8367	19.0883	12.9068	18.8954	17.0272	21.9707	17.5235	20.5878
94.2333	21.2014	21.644	20.078	21.294	21.606	17.3993	15.4186	18.2631	19.73	17.4827	18.9409	21.6301	18.1024	17.5903	16.4215	24.1671	17.3969	16.1295	14.4802	12.6746	15.4309	17.1811	13.19	15.6915	18.0894	19.0855	12.3067	18.4431	17.2147	22.2578	17.6706	21.2564
100.333	21.3415	22.0023	20.7928	21.238	21.9637	17.1382	15.6698	18.5331	19.9471	17.4959	19.0554	21.9805	18.4392	17.4909	16.5124	23.3949	17.5756	16.0866	14.3119	11.6925	15.2848	17.2738	12.7832	15.7858	18.2707	19.3657	11.9879	18.5988	17.4191	23.0109	18.3361	21.5245
106.433	21.4033	21.7822	21.097	21.3068	21.988	17.0077	15.9622	18.6399	20.5218	17.6675	19.2085	21.7232	18.7973	16.8504	16.5001	20.8275	17.8401	16.3427	14.1812	7.40414	15.2708	17.2324	12.4917	15.7619	18.5905	19.357	11.6457	18.5254	17.3967	23.2096	18.3891	21.8301
112.767	11.0704	12.8688	11.8824	13.1508	11.8892	13.2327	10.0739	11.9149	10.672	13.13	12.3015	13.477	11.204	14.0907	11.7556	16.6996	9.46687	12.2777	11.3743	9.5426	9.78757	12.024	10.7977	11.0053	10.8401	11.5218	10.8284	12.8988	9.57729	11.6711	12.0103	12.0175
118.867	9.62612	10.4716	9.78548	11.1825	9.56469	10.6976	8.28881	10.3593	8.77731	10.2762	9.82807	11.1421	9.07713	10.5225	9.26493	11.1274	8.43227	9.91671	9.42929	5.56295	8.26243	10.229	9.36567	9.6397	8.87317	9.74424	8.53791	10.0807	8.25336	10.0484	10.1231	10.4887
124.917	9.1207	9.51095	9.15545	10.2312	8.90468	9.45283	7.46327	9.32883	8.56016	9.21112	8.96688	10.0813	8.77749	8.79373	8.79184	9.70229	8.09696	9.30497	8.41971	3.95952	7.83832	9.5104	8.46307	9.01564	8.20228	9.12781	7.61744	9.27307	7.61654	9.83756	9.3024	9.645
131	8.67324	9.35955	8.83776	9.98639	8.60878	8.73836	7.19924	9.007	8.47019	9.35984	8.69066	9.93357	8.89169	8.7827	8.49716	9.14469	7.98214	8.97846	8.34461	-3.31055	8.12045	9.46857	8.05641	8.71833	8.32192	8.72362	7.70967	8.87425	7.69216	9.66086	9.08695	9.44918
137.1	8.38818	9.75687	8.59325	9.83608	8.47031	8.73972	6.97789	8.6522	8.26887	9.09708	8.48751	9.65346	8.75171	8.89415	8.09538	8.60169	8.06703	8.54664	8.27631	5.14388	7.71249	8.9572	8.01558	8.5414	8.00783	8.33949	7.22152	8.75296	7.57135	9.05147	8.81223	9.37053
143.2	8.07994	9.34288	8.31405	9.15938	8.21908	8.87777	6.81425	8.4246	7.98505	8.62408	8.11693	9.29207	8.27707	8.65292	7.87486	8.36364	7.51863	8.32332	7.87763	5.76353	7.26534	8.31056	7.67703	8.28118	7.46497	8.20376	6.84369	8.3733	7.22985	9.18679	8.38188	9.13685

## Sheet: Fig S1B
4 mM Glutamine	4 mM Glutamine + IL-1β	4 mM Glutamine + CB-839	4 mM Glutamine + CB-839 + IL-1β
28.2542	30.6321	27.3082	21.8441
29.7882	31.9707	26.0876	27.457
27.9488	31.1562	23.8226	23.8391
25.0597	32.8201	20.4762	24.7773
27.2027	27.3683	19.8024	19.1476
29.7611	33.3785	26.6044	30.5561
21.5588	29.7906	23.148	28.581
21.0198	26.144	24.26	25.0426

## Sheet: Fig S1C
Time (minutes)	4 mM Glutamine								4 mM Glutamine + IL-1β								4 mM Glutamine + CB-839								4 mM Glutamine + CB-839 + IL-1β
2.41667	128.532	135.621	150.559	137.522	131.497	122.364	159.029	167.976	52.0464	47.8446	40.8127	74.4925	46.2659	50.6757	51.8137	66.9466	67.4257	41.8616	37.7639	43.4741	68.7315	50.697	44.0687	37.7478	97.6565	87.5788	115.044	109.265	94.4729	78.0554	102.687	103.261
9.11667	126.735	131.22	142.139	134.753	128.934	128.036	142.158	157.194	53.6684	50.4092	37.9416	84.1741	46.6136	43.1833	48.9393	61.5511	68.0161	41.6042	38.7888	44.3512	50.0733	49.3556	43.1902	39.0873	92.1345	81.0698	107.297	105.435	94.568	79.073	97.0215	97.0239
15.8333	127.173	129.903	139.96	134.089	128.502	129.147	137.377	154.583	53.6656	50.5434	39.1747	82.0716	46.2556	45.5689	47.6927	60.5739	68.0907	41.5214	38.6282	44.785	57.0039	49.5422	43.2195	38.9958	89.0104	80.1028	104.247	103.65	93.8356	79.465	93.7897	95.96
22.5333	127.961	129.616	138.667	134.349	128.951	129.878	134.971	153.346	54.5288	50.275	39.221	81.7676	46.1046	46.7599	47.4924	60.4492	68.0526	42.237	39.1471	44.9923	59.3504	49.9471	43.2581	39.6304	92.9914	79.9283	102.239	102.701	94.5083	79.6016	92.2475	95.5964
29.4833	53.8627	49.4627	52.2806	53.1841	49.6774	53.4968	52.7842	51.9831	22.7245	30.9328	21.0752	49.8735	23.7676	24.0517	23.2077	26.7737	29.3656	23.2607	19.804	23.8416	27.5972	23.5447	19.6472	18.5443	33.2277	31.0748	36.9276	38.2713	38.1333	39.903	33.2273	38.3447
36.1833	49.7271	48.721	50.0359	51.0839	48.2207	52.0877	49.7291	52.9465	22.1734	30.0274	17.4826	48.1923	22.8416	23.8527	21.8445	26.3954	28.6884	22.1487	19.0007	23.6212	26.399	22.3325	19.1358	20.4419	33.6436	30.9774	37.1587	39.2586	36.4479	37.285	33.0158	38.2348
42.8833	49.4039	49.2085	50.1092	50.7522	48.4214	53.2765	49.2503	53.2998	22.5607	30.5102	16.3228	47.8206	23.671	23.6731	21.9706	26.3875	29.6999	22.2743	19.3242	23.1723	26.4146	22.8343	19.3818	20.4226	36.0257	31.8523	37.6345	39.4718	36.0859	36.9196	33.4548	38.9603
49.5833	48.9361	48.6704	48.986	49.8304	47.8597	53.6874	48.2601	53.1134	22.997	29.9915	16.5247	47.5956	23.2277	23.2052	21.473	26.9062	29.1781	22.3207	18.9667	23.1433	26.096	22.2365	19.1457	20.4199	34.1282	31.1636	37.4338	38.9061	36.0316	35.9605	32.5123	38.4263
56.5333	178.124	147.376	148.334	192.55	123.059	139.073	170.463	159.913	56.402	49.9258	39.3007	85.2212	41.5558	44.403	46.3553	56.5256	52.6048	33.9408	33.8798	38.5244	50.9519	40.5339	33.9655	31.9818	99.5099	79.6927	105.279	113.131	88.5572	74.1738	97.8139	97.4829
63.25	138.035	117.961	125.169	152.783	108.184	118.725	135.519	123.304	54.642	49.1509	35.8835	76.9606	43.4465	43.5173	43.4731	53.3664	47.5637	32.1459	30.5609	35.759	39.1964	36.5009	31.2334	30.3026	79.3719	68.4201	79.855	84.6922	74.2581	68.1641	76.083	79.5098
69.9333	132.123	114.847	123.427	143.649	104.981	113.494	129.466	118.426	53.5483	49.1454	35.5642	75.1643	43.878	43.5796	42.7719	52.8532	44.4759	30.2659	28.1596	33.2415	31.4671	33.6496	29.217	29.0627	77.0701	65.3727	75.2444	79.6776	71.8973	66.2403	72.0419	76.5989
76.65	131.646	114.948	123.523	141.774	105.989	112.589	128.532	118.712	54.4361	49.2248	36.0849	75.0453	44.459	43.6454	42.6892	53.4705	42.8313	28.8932	27.1427	32.2747	35.629	32.5453	28.2656	27.9596	74.8973	64.2111	73.114	78.3917	70.8949	65.4761	71.2489	75.3878
83.6	47.217	45.5194	45.3517	46.5458	41.2262	49.7497	35.3984	43.1391	16.0812	25.4475	14.5941	47.9777	20.49	18.0031	17.3396	27.6406	23.5245	17.0667	12.7385	18.0455	13.0257	14.4431	11.4671	13.2668	32.5389	28.4772	28.2563	30.3901	33.1036	32.8958	22.5601	32.2442
90.2667	42.5828	41.4517	40.3827	42.0448	35.9053	44.1976	35.0267	39.6901	15.4404	24.481	10.7156	43.487	19.7264	17.2067	15.7815	16.7214	22.4016	14.6355	12.5823	17.4773	7.65063	14.0918	14.1661	13.1913	31.0502	25.948	28.0895	30.3886	30.5137	30.4759	23.3088	31.6943
96.9667	41.3105	40.4106	39.512	42.2256	34.7295	42.8309	34.7772	38.5043	14.4694	24.7148	8.77327	42.2382	19.9079	17.1199	14.1624	24.7672	22.0549	14.4811	11.9951	17.3483	10.0013	13.9864	12.8015	14.348	30.101	25.9733	28.2365	30.7474	29.3437	30.2489	23.7446	31.5385
103.633	39.9662	39.1545	37.8846	40.5042	33.5194	41.1656	33.452	36.5229	14.8603	24.1649	9.09439	41.1056	19.602	16.5579	14.4579	21.3022	21.7118	14.1531	12.3367	16.6318	10.1774	14.0496	13.7062	13.6604	29.4548	25.4283	28.0311	29.9281	28.6047	28.8468	23.9999	30.7649

## Sheet: Fig S1D
4 mM Glutamine	4 mM Glutamine + IL-1β	4 mM Glutamine + CB-839	4 mM Glutamine + CB-839 + IL-1β
128.532	52.0464	67.4257	97.6565
135.621	47.8446	41.8616	87.5788
150.559	40.8127	37.7639	115.044
137.522	74.4925	43.4741	109.265
131.497	46.2659	68.7315	94.4729
122.364	50.6757	50.697	78.0554
159.029	51.8137	44.0687	102.687
167.976	66.9466	37.7478	103.261

## Sheet: Fig S1E
CTL	OA
1	1.79005
0.615572	0.823591
0.864537	1.75321
	2.14355
	0.68302
	2.04202
	2.31338
	1.10957

## Sheet: Fig S1F
CTL	OA
1	1.54756
0.594604	1.13288
0.63728	1.12506
	1.67018
	0.566442
	0.535887
	0.420448
	0.241484

## Sheet: Fig S1G
CTL	OA
1	4.62675
0.82932	4.05584
1.10191	6.40856
	6.19026
	1.3566
	1.11729
	2.71321
	1.6358

## Sheet: Fig S1H
CTL	OA
1	1.86607
0.287175	1.81504
0.946058	2.25012
	2.67586
	0.742262
	0.812252
	1.87905
	1.10957

## Sheet: Fig S1I
CTL	OA
1	3.65533
1.07923	4.43828
0.965936	4.82323
	4.31691
	3.22657
	2.80889
	4.25748
	1.93187

## Sheet: Fig S1J
CTL	OA
1	3040.3
0.697372	2665.15
0.858565	3565.78
	3640.7
	1144.1
	1136.2
	2797.65
	1573.76

[truncated: 3 more sheets: Fig S1K, Fig S1L, Fig S1M]
