# Supplementary material for: Glutamine metabolism modulates chondrocyte inflammatory response
Source: eLife. 2022 Aug 2;11:e80725. doi: 10.7554/eLife.80725 (PMC9371604; doi:10.7554/eLife.80725)
Supplement: Figure 1—source data 1. [file elife-80725-fig1-data1.xlsx]

## Sheet: Fig 1A
Untreated	IL-1β		Test	P value
1	0.779165		Paired T test	0.0014
1.52626	0.835088
1	0.659754
1.16473	0.687771
1	0.336808
1.17283	0.521233

## Sheet: Fig 1B
Untreated	IL-1β
1	1.15669		Paired T test	0.3858
1.18921	1.18099
1	0.876606
1.16473	1.03526
1.07177	0.752623
1.18099	0.732043
1	0.496546
1.43396	0.812252
1	1.50525
1.21419	1.61328

## Sheet: Fig 1C
Untreated	IL-1β
1	1.28343		Paired T test	0.0064
1.43396	2.04202
1	1.75321
1.30134	1.51572
1	1.3566
0.993092	1.22264

## Sheet: Fig 1D
Untreated	IL-1β
1	7.56846		Paired T test	0.0034
1.05702	11.0809
1	14.3204
1.81504	12.2101
1	5.85634
0.80107	4.16986

## Sheet: Fig 1E
Untreated	IL-1β
1	0.356013		Paired T test	0.0018
1.42405	0.659754
1.03526	0.473029
1.08673	0.460094
1	0.664343
1.01396	0.76313
1	1.00696
1.16473	0.823591

## Sheet: Fig 1F
4 mM Glutamine	0 mM Glutamine
0.517	0.369
0.464	0.364		Unpaired T test	<.0001
0.48
0.503	0.39
0.45	0.344
0.475	0.344
0.47	0.338
0.476	0.352

## Sheet: Fig 1G
Untreated	CB-839
46957	33235
	33108		Unpaired T test	<.0001
49084	33662
47192	32946
47856	31914
49832	32844
48952	33603
	34042

## Sheet: Fig 1H
100% Glutamine	100% Glutamine + IL-1β	GLS inhibitor	GLS inhibitor + IL-1β
1558	1417	1146	989			One way ANOVA with Tukey's multiple comparisons
1722	1293	1414	1046
1621	1315	1322	1002			Tukey's multiple comparisons test	Mean Diff.	95.00% CI of diff.	Significant?	Summary	Adjusted P Value
1646	1235	1168	900			100% Glutamine vs. 100% Glutamine + IL-1β	339.4	217.4 to 461.3	Yes	****	<0.0001
1470	1163	1401	1015			100% Glutamine vs. GLS inhibitor	271	149.0 to 393.0	Yes	****	<0.0001
1588	1197	1392	1068			100% Glutamine vs. GLS inhibitor + IL-1β	587	465.0 to 709.0	Yes	****	<0.0001
1514	1239	1272	987			100% Glutamine + IL-1β vs. GLS inhibitor	-68.38	-190.3 to 53.60	No	ns	0.4335
1518	1063	1354	934			100% Glutamine + IL-1β vs. GLS inhibitor + IL-1β	247.6	125.7 to 369.6	Yes	****	<0.0001
						GLS inhibitor vs. GLS inhibitor + IL-1β	316	194.0 to 438.0	Yes	****	<0.0001

## Sheet: Fig 1I
Time (minutes)	4 mM Glutamine								4 mM Glutamine + IL-1β								0 mM Glutamine								0 mM Glutamine + IL-1β
2.41667	9.55449	16.7812	14.0814	5.3678	17.9335	16.8411	16.0761	13.3611	6.35822	21.9768	16.899	15.6464	10.0496	13.2593	18.5082	17.5128	8.51609	11.7844	7.55059	10.0126	8.35481	13.7261	8.8745	5.17688	10.8526	14.6024	6.77585	9.7288	17.1441	14.5844	10.198	6.11396
8.51667	12.9726	14.0306	15.6364	13.7947	15.0564	14.2618	13.718	14.1247	12.5987	15.8071	16.1633	15.1233	12.4575	14.091	13.5574	14.3926	12.6728	10.7442	10.9816	12.1094	10.8825	12.7654	11.8211	10.3163	12.6256	11.9498	10.124	10.9466	12.7785	11.9248	11.3245	10.398
14.6	13.0975	13.8297	15.6254	14.9272	15.3064	13.7856	13.6266	14.2538	13.8043	15.0724	15.7225	15.1378	13.0028	13.6768	13.4786	14.1501	12.5732	11.0871	11.2417	11.7716	11.7272	13.6625	12.5681	10.7308	12.6694	10.8396	10.4698	10.5919	13.3092	11.7808	11.36	11.0977
20.7	12.8141	13.994	15.4906	15.2734	15.2403	13.5808	13.1461	14.3961	14.0681	14.4628	15.5211	15.7733	13.0896	13.7984	13.5509	14.0713	12.2597	10.0367	10.9513	11.4465	11.8224	12.1808	12.4318	10.7755	12.4674	11.7322	10.5141	10.2361	12.9279	11.8997	11.3846	10.9369
26.7833	12.819	14.8669	15.1614	15.1321	15.1966	13.3883	12.9282	14.2486	13.9923	14.4159	15.1736	15.7005	13.335	13.9431	13.3382	14.0499	11.999	10.5115	10.8972	11.3724	11.762	12.0182	12.3224	10.6903	12.1513	11.7991	10.5337	10.1484	12.7547	11.7849	11.2925	10.8997
32.8667	12.4962	13.6097	14.8903	14.7646	15.0535	13.1497	12.8501	13.9218	13.8393	14.0966	14.9248	15.6527	13.1436	13.6864	13.2517	13.8183	11.8572	10.3425	10.5868	10.9565	11.5566	11.6482	12.2732	10.4132	12.0572	11.4633	10.356	9.90441	12.3518	11.356	10.9811	10.4404
39.2	28.2542	29.7882	27.9488	25.0597	27.2027	29.7611	21.5588	21.0198	30.6321	31.9707	31.1562	32.8201	27.3683	33.3785	29.7906	26.144	15.5767	14.8529	15.7443	15.6311	14.166	17.2821	16.3311	14.6547	20.7947	19.2739	17.7021	16.4562	19.6447	20.6432	19.3388	19.7443
45.3	25.858	25.5952	25.2713	24.4421	24.6954	25.0282	19.2769	20.9098	28.1626	27.0929	27.0028	30.8561	25.6204	28.9151	25.7173	26.719	14.4774	13.8238	14.195	14.2063	13.4849	15.7498	15.3753	13.1392	17.8663	15.8527	15.1561	13.8858	17.5645	17.1242	16.1801	16.6315
51.3833	24.0278	23.9846	23.6954	23.9742	23.6937	22.4726	18.3209	20.2715	26.4665	25.3097	25.1793	29.5877	24.3758	25.8799	23.4918	26.8053	14.2238	12.1292	13.8177	13.9058	12.9621	14.8916	14.9184	12.9634	17.3587	15.5566	14.6484	13.6528	17.0806	16.8625	15.7471	16.1218
57.4667	22.2584	22.8829	23.1221	22.75	22.9376	21.1449	17.9576	19.8842	26.0074	24.3345	24.5827	28.9263	24.2562	24.2685	22.3025	26.3605	14.1839	12.941	13.5505	13.837	12.9687	14.4325	14.572	12.9109	17.4456	16.3907	14.5435	13.7094	17.0642	16.8457	15.9181	15.8929
63.5667	21.5262	21.9641	22.846	22.0333	22.3929	19.819	17.46	19.5369	24.9535	23.3514	23.9561	28.2635	23.3764	23.1945	21.3563	25.8628	13.964	12.5364	13.2911	13.4203	12.8774	13.9438	14.3098	12.611	17.1621	16.6205	14.4455	13.4371	16.879	16.5663	15.8401	15.1957
69.6667	21.1566	21.7062	22.861	21.8465	22.1145	19.0505	17.3114	19.5629	23.9014	22.8308	23.5321	27.3353	22.2895	22.5441	20.7452	25.3445	13.826	12.017	13.2534	13.4353	12.9566	13.998	14.1906	12.6477	16.8271	16.3627	14.144	13.2724	16.548	16.3852	15.6189	15.0244
76	20.7245	22.4618	20.9999	20.2564	21.9946	20.9238	16.6492	19.4442	20.1163	22.2775	21.4628	23.7008	18.7036	21.6296	19.5997	21.9088	11.9253	10.7205	11.2767	11.2529	11.2382	12.949	12.6506	10.8865	14.338	14.2279	12.5363	12.3201	14.8938	15.079	14.7177	13.7809
82.05	20.9746	20.7771	20.108	20.3575	21.2364	18.987	15.8279	18.6771	19.7058	18.9201	19.7082	22.4028	18.1752	19.149	17.0431	24.7305	12.181	10.7003	11.6584	11.62	11.0965	12.7439	12.4105	11.0757	14.0681	13.665	12.4168	11.8051	13.954	14.1939	14.2344	13.6104
88.1333	21.2274	21.2804	20.026	21.1029	21.5584	18.0381	15.759	18.4538	19.744	18.0006	19.1452	22.2225	18.0936	18.2313	16.6983	25.1296	12.2583	10.9033	11.8221	11.8822	11.1023	12.5767	12.4077	10.9678	13.9276	13.5713	12.3927	11.6605	13.8632	14.1566	13.9785	13.5695
94.2333	21.2014	21.644	20.078	21.294	21.606	17.3993	15.4186	18.2631	19.73	17.4827	18.9409	21.6301	18.1024	17.5903	16.4215	24.1671	12.1174	10.5738	11.96	12.1136	10.7573	12.1865	12.0105	11.0914	13.6308	13.6623	12.1399	11.984	13.6488	13.8393	13.9024	13.496
100.333	21.3415	22.0023	20.7928	21.238	21.9637	17.1382	15.6698	18.5331	19.9471	17.4959	19.0554	21.9805	18.4392	17.4909	16.5124	23.3949	12.43	10.6335	12.0955	12.2265	10.9772	12.1317	12.2762	11.558	13.7569	13.7215	12.3574	12.4854	13.9346	13.879	13.9482	13.9971
106.433	21.4033	21.7822	21.097	21.3068	21.988	17.0077	15.9622	18.6399	20.5218	17.6675	19.2085	21.7232	18.7973	16.8504	16.5001	20.8275	12.2871	10.7228	12.0183	12.1806	11.1552	12.5431	12.6992	11.6972	14.1471	13.883	12.2025	12.3161	13.9598	13.9021	13.966	14.2552
112.767	11.0704	12.8688	11.8824	13.1508	11.8892	13.2327	10.0739	11.9149	10.672	13.13	12.3015	13.477	11.204	14.0907	11.7556	16.6996	13.7557	13.4055	14.9195	11.3291	11.1802	12.4535	12.4783	10.4799	14.3443	12.5572	9.61161	9.10171	14.0699	30.2867	11.5027	11.9364
118.867	9.62612	10.4716	9.78548	11.1825	9.56469	10.6976	8.28881	10.3593	8.77731	10.2762	9.82807	11.1421	9.07713	10.5225	9.26493	11.1274	8.95624	9.46132	9.4897	8.60842	8.52542	10.4242	9.86093	8.33196	9.7781	9.82536	7.94807	7.59812	9.5408	17.6595	9.28948	9.09371
124.917	9.1207	9.51095	9.15545	10.2312	8.90468	9.45283	7.46327	9.32883	8.56016	9.21112	8.96688	10.0813	8.77749	8.79373	8.79184	9.70229	8.40777	8.00283	8.39694	8.21491	7.93286	9.65281	9.07632	7.8834	8.47848	8.81784	7.40248	7.08376	7.70097	10.7279	8.29585	8.13875
131	8.67324	9.35955	8.83776	9.98639	8.60878	8.73836	7.19924	9.007	8.47019	9.35984	8.69066	9.93357	8.89169	8.7827	8.49716	9.14469	7.89556	7.93031	7.89124	7.91402	7.51493	9.83108	8.68615	7.26523	7.99981	8.06436	7.02901	6.76609	7.83556	9.02534	7.96693	7.90415
137.1	8.38818	9.75687	8.59325	9.83608	8.47031	8.73972	6.97789	8.6522	8.26887	9.09708	8.48751	9.65346	8.75171	8.89415	8.09538	8.60169	7.62268	7.322	7.64058	7.8539	7.11924	8.78709	8.22909	7.04829	7.80015	8.31262	7.08131	6.43584	7.90588	8.37618	7.76426	7.73525
143.2	8.07994	9.34288	8.31405	9.15938	8.21908	8.87777	6.81425	8.4246	7.98505	8.62408	8.11693	9.29207	8.27707	8.65292	7.87486	8.36364	7.48937	6.83029	7.16174	7.60937	6.77219	7.90202	7.80914	6.84678	7.13107	8.76065	6.62318	6.18677	7.55016	7.88473	7.39737	7.11475

## Sheet: Fig 1J
4 mM Glutamine	4 mM Glutamine + IL-1β	0 mM Glutamine	0 mM Glutamine + IL-1β
28.2542	30.6321	15.5767	20.7947
29.7882	31.9707	14.8529	19.2739
27.9488	31.1562	15.7443	17.7021
25.0597	32.8201	15.6311	16.4562
27.2027	27.3683	14.166	19.6447
29.7611	33.3785	17.2821	20.6432
21.5588	29.7906	16.3311	19.3388
21.0198	26.144	14.6547	19.7443

[truncated: 3 more sheets: Fig 1K, Fig 1L, Sheet13]
