# Supplementary material for: Glutamine metabolism modulates chondrocyte inflammatory response
Source: eLife. 2022 Aug 2;11:e80725. doi: 10.7554/eLife.80725 (PMC9371604; doi:10.7554/eLife.80725)
Supplement: Figure 2—figure supplement 1—source data 1. [file elife-80725-fig2-figsupp1-data1.xlsx]

## Sheet: Fig S2A
100% Glutamine	100% Glutamine + IL-1β	0% Glutamine	0% Glutamine + IL-1β
1	0.689396	1.50071	0.741962
1.20531	0.632388	1.26582	0.75165
1.10166	0.757106	1.35155	0.555647
1.12231	0.719129	1.67468	0.545286
1.11342	0.654393	1.0798	0.453894
0.895883	0.689396	1.25225	0.528967

## Sheet: Fig S2B
100% Glutamine	100% Glutamine + IL-1β	0% Glutamine	0% Glutamine + IL-1β
1	1.31349	1.03932	1.17236
0.926205	1.17193	0.920235	1.2381
0.678154	1.3366	0.837763	0.871904
0.905301	1.44826	0.935551	0.79283
0.76049	1.06306	1.07234
0.646796	1.07431	0.77085

## Sheet: Fig S2C
100% Glutamine	100% Glutamine + IL-1β	0% Glutamine	0% Glutamine + IL-1β
1	0.552254	0.996984	0.466328
1.17235	0.594143	0.668998	0.513392
0.747261	0.663684	0.89169	0.42995
1.12231	0.576073	0.922671	0.321989
0.982821	0.557958	0.877071	0.521387
0.889695	0.354389	0.609003	0.500433

## Sheet: Fig S2D
100% Glutamine	100% Glutamine + IL-1β	0% Glutamine	0% Glutamine + IL-1β
1	1.5088	1.91274	1.1403
0.900878	1.61203	1.98629	1.35485
1.21393	1.55678	1.31459	1.08091
1.57622	1.44826	1.65163	0.982878
1.429	1.6113	1.1573	1.18134
1.00096	1.55122	1.42852	1.19024

## Sheet: Fig S2E
100% Glutamine	100% Glutamine + IL-1β	0% Glutamine	0% Glutamine + IL-1β
1	1.5193	2.21245	1.16426
1.1805	1.14781	2.36211	1.35485
0.823411	1.36468	1.5418	0.890224
1.23668	1.50976	1.51981	1.12123
1.11342	1.13936	1.58092	0.933309
0.865366	1.15942	1.34213	1.19024

## Sheet: Fig S2F
100% Glutamine	100% Glutamine + IL-1β	0% Glutamine	0% Glutamine + IL-1β
0.357	0.412	0.261	0.3
0.362	0.411	0.248	0.277
0.33	0.387	0.233	0.295
0.331	0.4	0.236	0.321
0.335	0.423	0.238	0.298
0.328	0.402	0.226	0.274
0.332	0.373	0.235	0.373
0.344	0.39	0.232	0.284

## Sheet: Fig S2G
100% Glutamine	100% Glutamine + IL-1β	0% Glutamine	0% Glutamine + IL-1β
1.07015	0.634834	1.892	1.47593
0.933741	0.677154	1.9052	1.15414
0.836966	0.659349	1.60444	1.05055
