# Supplementary material for: Glutamine metabolism modulates chondrocyte inflammatory response
Source: eLife. 2022 Aug 2;11:e80725. doi: 10.7554/eLife.80725 (PMC9371604; doi:10.7554/eLife.80725)
Supplement: Figure 2—source data 1. [file elife-80725-fig2-data1.xlsx]

## Sheet: Fig 2A
100% Glutamine	100% Glutamine + IL-1β	0% Glutamine	0% Glutamine + IL-1β
1	1.23405	0.352487	0.517423
1.07133	1.0489	0.341528	0.524179
0.919986	1.53535	0.481169	0.421102
0.963576	1.29623	0.621527	0.534064
0.923383	1.01976	0.528789	0.453894
0.779912	0.96153	0.461538	0.521684

## Sheet: Fig 2B
100% Glutamine	100% Glutamine + IL-1β	0% Glutamine	0% Glutamine + IL-1β
1	1.97713	0.617985	0.598497
1.33737	2.23284	0.570411	0.569644
1.04224	2.21694	0.410261	0.497318
1.3627	1.95115	0.494447	0.508769
0.969291	2.02543	0.479886	0.590671
0.66498	2.04685	0.455184	0.578845

## Sheet: Fig 2C
100% Glutamine	100% Glutamine + IL-1β	0% Glutamine	0% Glutamine + IL-1β
1	2.59081	0.553112	0.528295
1.04928	2.60067	0.590527	0.701314
0.768269	3.45472	0.556562	0.473764
1.03273	2.75934	0.675435	0.51946
0.798299	2.70988	0.55894	0.598917
0.599314	2.57292	0.404587	0.664918

## Sheet: Fig 2D
100% Glutamine	100% Glutamine + IL-1β	0% Glutamine	0% Glutamine + IL-1β
0.0039	0.00347	0.00179	0.00188
0.00368	0.00314	0.00197	0.00174
0.00307	0.00283	0.00173	0.00174

## Sheet: Fig 2E
100% Glutamine	100% Glutamine + IL-1β	0% Glutamine	0% Glutamine + IL-1β
0.02244	0.01285	0.0017	0.00163
0.01827	0.00876	0.00164	0.0016
0.01242	0.00792	0.00164	0.00152

## Sheet: Fig 2F
100% Glutamine	100% Glutamine + IL-1β	0% Glutamine	0% Glutamine + IL-1β
13.3173	12.8947	12.934	12.6299
13.0291	13.9037	13.2001	13.1792
14.417	13.5984	12.4546	12.8272

## Sheet: Fig 2G
100% Glutamine	100% Glutamine + IL-1β	0% Glutamine	0% Glutamine + IL-1β
0.03121	0.03176	0.03376	0.03215
0.02355	0.01562	0.01429	0.02647
0.01865	0.02368	0.04992	0.05815

## Sheet: Fig 2H
100% Glutamine	100% Glutamine + IL-1β	0% Glutamine	0% Glutamine + IL-1β
29.6271	12.1254	30.8335	14.8387
32.3174	16.5795	23.5955	25.274
22.8474	17.2883	32.6297	23.141

## Sheet: Fig 2I
100% Glutamine	100% Glutamine + IL-1β	0% Glutamine	0% Glutamine + IL-1β
0.01169	0.00719	0.00347	0.00397
0.01065	0.00542	0.00362	0.00402
0.00722	0.0055	0.00282	0.00455

## Sheet: Fig 2J
100% Glutamine	100% Glutamine + IL-1β	0% Glutamine	0% Glutamine + IL-1β
0.0018	0.00151	0.00095	0.00131
0.0018	0.00152	0.00147	0.00098
0.00174	0.00152	0.00118	0.00117

[truncated: 1 more sheets: Fig 2K]
