# Supplementary material for: Glutamine metabolism modulates chondrocyte inflammatory response
Source: eLife. 2022 Aug 2;11:e80725. doi: 10.7554/eLife.80725 (PMC9371604; doi:10.7554/eLife.80725)
Supplement: Figure 3—figure supplement 1—source data 1. [file elife-80725-fig3-figsupp1-data1.xlsx]

## Sheet: Fig S3A
Untreated	Untreated + IL-1β	CB-839	CB-839 + IL-1β
1	1192.69	1.72907	621.668
1.46409	1144.1	1.47427	670.921
1.40444	1128.35	1.17283	714.109
3.07375	942.272	0.692555	621.668

## Sheet: Fig S3B
					original raw data

## Sheet: Fig S3C
Untreated	CB-839	IL-1β	CB-839 + IL-1β
60	56	358	232
50	42	268	211
51	52	342	246
37	41	296	216

## Sheet: Fig S3D
Untreated	IL-1β	NH4Cl	NH4Cl + IL-1β	Glutamate	Glutamate + IL-1β
143	2045	115	3340	102	1916
112	1726	117	3279	113	1761
113	1819	155	3057	96	1895
94	1604	95	2821	148	1766
113	1804	177	3318	126	1848
103	1872	164	3517	115	1806
135	1798	162	3335	123	1831
134	1600	156	3095	97	1840

## Sheet: Fig S3E
Untreated	IL-1β	Asparagine	Asparagine + IL-1β	Untreated	IL-1β	Asparagine	Asparagine + IL-1β
1	1379.57	1.55833	1168.14	4.14106	613.109	7.31065	541.193
1.19748	1243.34	2.04202	1176.27	3.91768	608.874	4.25748	613.109
0.920188	1897.65	2.65737	1332.57	5.42642	418.766	3.94493	471.136
1.58008	1758.34	1.55833	1128.35	6.27667	803.414	3.86375	481.036

## Sheet: Fig S3F
Untreated	IL-1β	EGCG	EGCG + IL-1β
1	714.109	0.463294	461.44
0.806642	617.374	0.712025	374.806
1.81504	714.109	0.25	372.217
1.19748	576.03	0.641713	362.039
