# Supplementary material for: Glutamine metabolism modulates chondrocyte inflammatory response
Source: eLife. 2022 Aug 2;11:e80725. doi: 10.7554/eLife.80725 (PMC9371604; doi:10.7554/eLife.80725)
Supplement: Figure 3—source data 1. [file elife-80725-fig3-data1.xlsx]

## Sheet: Fig 3A
4 mM Glutamine	4 mM Glutamine + IL-1β	0 mM Glutamine	0 mM Glutamine + IL-1β
1	188.706	0.126745	24.2515
1.08673	124.5	0.213159	28.0514
1	491.143	3.38698	128.89
2.02792	477.713	2.58471	118.603
1	213.783	0.628507	97.6806
0.939523	298.172	0.381565	97.6806
1.21419	286.026	0.447513	91.1392
1.03526	263.197	0.339151	97.6806
1	280.139	0.80107	44.3235
0.550953	294.067	0.784584	39.9466
0.812252	160.898	0.289172	78.249
0.702222	190.019	0.0504151	78.249
1	404.501	0.351111	72.5046
0.550953	421.679	0.348686	76.6386
1	548.748	0.269807	68.1197
0.870551	263.197	0.41466	61.8199

## Sheet: Fig 3B
4 mM Glutamine	4 mM Glutamine + IL-1β	0 mM Glutamine	0 mM Glutamine + IL-1β
1	4.69134	0.598739	2.60268
1.15669	4.46915	0.550953	1.61328
1	5.24157	0.408951	1.87905
0.846745	5.27803	0.41466	1.91853
1	11.8762	0.846745	8.1681
1.21419	16.2234	0.959264	6.54322

## Sheet: Fig 3C
4 mM Glutamine	2 mM Glutamine	0 mM Glutamine	4 mM Glutamine + IL-1β	2 mM Glutamine + IL-1β	0 mM Glutamine + IL-1β
60	94	58	2186	1308	794
50	95	96	1671	1315	832
51	85	66	2148	1241	723
37	104	83	1760	1405	831

## Sheet: Fig 3D
									1- untreated	100% glutamine
									2- IL-1b 1 hr
							IB: IkB-z		3- Il-1b 3 hr
									4- IL-1b 6 hr
									5- IL-1b 18 hr
									6- IL-1b 24 hr
									7- Untreated	0% glutamine
									8- IL-1b 1 hr
									9- IL-1b 3 hr
									10- IL-1b 6 hr
									11- IL-1b 18 hr
									12- IL-1b 24 hr
							IB- Actin
			original raw

## Sheet: Fig 3E
4 mM Glutamine	4 mM Glutamine + IL-1β	0 mM Glutamine	0 mM Glutamine + IL-1β
6953	11899	3821	4692
5920	11291	4483	4661
5383	11506	3811	4558
3907	12536	3005	4620
5488	14260	3492	5201
5446	12726	3369	6157

## Sheet: Fig 3F
		raw labeled data				original raw data			This part is unrelated experiment

## Sheet: Fig 3G
Untreated	IL-1β	NH4Cl (2 mM)	IL-1β + NH4Cl	Untreated	IL-1β	NH4Cl (2 mM)	IL-1β + NH4Cl
1	270.597	0.747425	433.534	0.939523	48.8403	1.02101	109.896
0.598739	195.361	0.060371	294.067	0.646176	39.6706	0.48971	82.1393
0.779165	272.479	0.726986	588.134	0.97942	45.8866	1.58008	106.891
0.395021	186.108	0.356013	442.643	0.812252	45.8866	0.535887	79.8932

## Sheet: Fig 3H
Untreated	IL-1β	NH4Cl (2 mM)	IL-1β + NH4Cl	Untreated	IL-1β	NH4Cl (2 mM)	IL-1β + NH4Cl
1	73.0089	1.45397	106.153	1.1487	35.7532	1.85318	50.2134
0.939523	77.7085	1.61328	73.5167	1.26576	38.8542	1.82766	49.8665
1.10957		1.10957	96.3358	1.39474	20.5348	1.23971	55.7152
1.59107	72.5046	1.61328	99.7331	1.10191	23.5883	1.47427	57.68

## Sheet: Sheet9
Fi
