# Supplementary material for: Glutamine metabolism modulates chondrocyte inflammatory response
Source: eLife. 2022 Aug 2;11:e80725. doi: 10.7554/eLife.80725 (PMC9371604; doi:10.7554/eLife.80725)
Supplement: Figure 4—figure supplement 1—source data 1. [file elife-80725-fig4-figsupp1-data1.xlsx]

## Sheet: A
p62	Actin		62/actin
3931.67	5622.32		0.699297
1606.29	5757.18		0.279006
5954.33	6078.25		0.979613
4233.13	5860.5		0.722315
4740.23	5923.55		0.800234
3940.9	6141.88		0.641644

## Sheet: B
LC3-1	LC3-2		LC3-I/LC3-II
1699.17	6239.72		0.272315
250.574	292.014		0.858089
2286.34	7457.41		0.306586
598.721	861.694		0.694819
1299.06	7044.41		0.18441
657.611	2058.45		0.319469

## Sheet: C
100% Glutamine	100% Glutamine + IL-1β	0% Glutamine	0% Glutamine + IL-1β
1.0781	1.05438	1.17185	1.02445
0.988338
0.846849	1.32098	1.30074	0.674548
1.06253	0.764695	0.804278	0.51091
		1.16476
1.23709
		0.905602
1.04337	0.837095	0.981833	0.571753
0.79527	0.675992	0.827885	0.526991

## Sheet: D
100% Glutamine	100% Glutamine + IL-1β	0% Glutamine	0% Glutamine + IL-1β
1.03196	1.15622	0.799977	1.16934
1.15167	1.50895	0.552163	0.639233
0.917978	1.17358	0.679624	0.722536
1.07038	0.876795	0.707379	0.526675
0.79527	0.643945	0.721034	0.517632
0.944421		1.16105
0.736268		1.04888

## Sheet: E
0	1	3	6	24	48
1	1.11729	0.895025	0.632878	1.17283	0.632878
1.12506	0.817902	0.757858	0.697372	1.15669	0.678302
1.30134	0.823591	0.707107	0.687771	0.858565	0.959264
1.17283	0.895025	0.641713	0.48971	0.952638	0.578344

## Sheet: F
0	1	3	6	24	48
1	0.888843	0.933033	0.876606	1.13288	0.726986
0.888843	0.864537	0.692555	0.598739	1.18921	0.768438
1.02811	0.933033	0.619854	0.76313	0.933033	1.02811
	0.82932	0.602904	0.582367	1.16473	0.697372

## Sheet: G
								Original raw data

## Sheet: H
							original raw data

## Sheet: I
	Original raw data

## Sheet: J
p62	Actin		62/actin
2660.78	2098.37		1.26802
2817.49	2056.16		1.37027
3581.22	2104.55		1.70166
4486.61	2078.81		2.15826
5335.02	2082.93		2.56131
6316.4	2267.23		2.78595
1350.18	2084.99		0.647572
1744.31	2177.65		0.801005
1818.7	2133.38		0.8525
2805.62	2230.16		1.25803
3732.38	2223.99		1.67824
4678.93	2397.99		1.95119

[truncated: 8 more sheets: K, L, M, N, O, P, Q, Sheet3]
