# Supplementary material for: Glutamine metabolism modulates chondrocyte inflammatory response
Source: eLife. 2022 Aug 2;11:e80725. doi: 10.7554/eLife.80725 (PMC9371604; doi:10.7554/eLife.80725)
Supplement: Figure 5—figure supplement 1—source data 1. [file elife-80725-fig5-figsupp1-data1.xlsx]

## Sheet: Fig S5B
Untreated	Rapamycin	IL-1β	Rapamycin + IL-1β	Untreated	Rapamycin	IL-1β	Rapamycin + IL-1β
1	0.456916	5.85634	3.83706	0.721965	0.590496	2.88786	1.38511
1.05702	0.423373	5.09824	3.63008	0.550953	0.444421	2.82843	1.91853
1.03526	0.578344	7.1602	4.19887	0.747425	0.721965	2.18859
1.1487	0.607097	5.77572	2.69447	0.628507	0.554785	3.91768

## Sheet: Fig S5C
Untreated	Rapamycin	IL-1β	Rapamycin + IL-1β	Untreated	Rapamycin	IL-1β	Rapamycin + IL-1β
1	0.846745	1.49485	2.37841	0.952638	1.23114	1.07923	1.71713
1.23114	0.946058	1.20581	3.53081	0.993092	0.858565	1.21419	2.11404
1.10191	1.12506	1.72907	3.16017	1.75321	1.36604	1.05702
1.23114	1.09429	1.41421	1.76541	1.61328	0.876606	1.25701

## Sheet: Fig S5D
Untreated	Rapamycin	IL-1β	Rapamycin + IL-1β	Untreated	Rapamycin	IL-1β	Rapamycin + IL-1β
1	1.24833	0.68302	0.812252	1.49485	2.56685	0.90125	0.80107
0.870551	1.20581	0.590496	1.08673	1.76541	2.2974	0.926588	1.06437
1.13288	1.87905	0.784584	1.02811	2.01391	3.01049	0.742262
1.43396	1.44393	0.747425	0.752623	1.54756	2.04202	1.43396

## Sheet: Fig S5E
Untreated	Rapamycin	IL-1β	Rapamycin + IL-1β	Untreated	Rapamycin	IL-1β	Rapamycin + IL-1β
1	0.80107	1.6245	1.31039	1.10957	1.29235	1.48452	0.959264
0.939523	0.972655	1.32869	1.69349	1.30134	0.965936	1.44393	1.02811
0.972655	1.23114	1.69349	1.47427	1.15669	1.51572	0.933033
1.23971	1.16473	1.49485	1.07923	1.13288	1.00696	2
