# Supplementary material for: Glutamine metabolism modulates chondrocyte inflammatory response
Source: eLife. 2022 Aug 2;11:e80725. doi: 10.7554/eLife.80725 (PMC9371604; doi:10.7554/eLife.80725)
Supplement: Figure 5—source data 1. [file elife-80725-fig5-data1.xlsx]

## Sheet: Fig 5A
		original raw
								Original raw data

## Sheet: Fig 5B
						original raw data

## Sheet: Fig 5C
Untreated	Rapamycin	IL-1β	Rapamycin + IL-1β	Untreated	Rapamycin	IL-1β	Rapamycin + IL-1β
1	2.58471	1379.57	4705.07	4.14106	4.02782	613.109	885.286
1.19748	1.38511	1243.34	5556.65	3.91768	3.97237	608.874	1686.71
0.920188	2.53151	1897.65	7486.11	5.42642	7.11074	418.766	1067.48
1.58008	1.36604	1758.34	4039.61	6.27667	4.05584	803.414	962.071

## Sheet: Fig 5D
Untreated	Rapamycin	IL-1β	Rapamycin + IL-1β	Untreated	Rapamycin	IL-1β	Rapamycin + IL-1β
1	1.09429	73.0089	82.7106	1.1487	1.89212	35.7532	28.0514
0.939523	1.02811	77.7085	108.383	1.26576	1.45397	38.8542	31.3414
1.10957	1.6358	106.153	134.364	1.39474	2.34567	20.5348	53.8174
1.59107	1.39474	72.5046	85.6274	1.10191	2.28153	23.5883	57.2816
